# Supplementary material
Source: publisher site journal article supplement (https://www.dovepress.com/article/391532)
Supplement: Supplementary file 1 [file get_supplementary_file.php]

**Appendix 1. Summary of feedback and revisions to the preliminary list of attributes and levels.**

| **Category** | **Participant Feedback and Experience** | **Revisions Made** |
| --- | --- | --- |
| **Framing of the task** | *Hypothetical**Framing:* Clients often based their responses on their current iOAT care. | Interviewers to reiterate verbally that some choices may not reflect their current care and to consider how they would want an iOAT site to be set up from a blank slate based on their wants. |
| *Want Framing:* Clients were inconsistent in how they framed the tasks. They all understood most/least wanted, but some said aloud “most/least important, most/least care about, most/least need”. This was done ununiformly (there are no particular questions that prompted different framing). | An interviewer note was added that reinforces that participants should choose based on what they **want** most or least |
| *Timing Framing:* Clients had questions about time and positionality when selecting their choices. | Re-wrote the slide instructions more clearly and created an interviewer prompt to emphasize that choices should be made based on clients’ **current** needs and preferences. |
| *Current vs. Former iOAT Client Framing:* Former iOAT clients felt confused by the framing “continue with this care” since they are no longer receiving this treatment. Some tried to think retrospectively about what they would have wanted most/least. | Task framing was revised to account for both groups of participants: *“Within the options listed below, which is the most wanted/least wanted for you to continue with iOAT or for you to try it again?”* |
| **Accessibility** | *Visual Accessibility:* Participants had challenges reading white text on coloured background, and the screen size was difficult for some participants to view. | The relevant slides were changed to white background with dark text. We added an interviewer note to offer to hook the laptop up to a monitor with a bigger screen. |
| *Literacy:* Some clients had computer literacy challenges clicking desired options with the mouse, and challenges with reading/comprehending content heavy slides (educational materials). | Added interviewer note to offer to do the clicking for the participant. Added interviewer note to verbalize the attribute and levels overview slides and check-in on participants’ understanding of each before starting the survey. |
| *Language Accessibility:* Clients were confused by the word “iMeds” and disliked the titles “Attributes” and “iOAT Delivery”. | “iMeds” was changed to “injectable medication”. “Attributes” was changed to “categories”. “iOAT delivery” was changed to “how iOAT could be offered”. |
| **Conceptualization of attributes and levels** | Some confusion about level 7.3. One client suggested focusing on being “in and out” and the transaction speed. One client was unsure what “low barrier” meant. | The level was revised to, “the site’s priority is to provide easy access to iMeds”. |
| Shorten “listens to my input”. | Level 1.3 and 2.3 were changed to “listens to me”. |
| Some uncertainty about level 5.2 (where the medication is being taken). | Level was revised to, “I come to take my iMeds onsite on my own schedule and leave when I see fit”. This clarifies meds are still being taken onsite. |
| Level 4.3 is too wordy. Remove definition of place, which is intuitive. | Removed definition of place in level 4.3 |
| Clarify the meaning of “at my own site” in level 3.2 to ensure clients know it doesn’t mean at home. | Level 3.2 rephrased to, “I only receive and inject my medication at one site”. |
| On level 2.1, a client commented that while they want to decide, they want to do so with their doctor’s knowledge and educated experience. They suggested adding, “with the clinical advice from my doctor”. | The client’s comment captures what is meant by option 2.3. In order to emphasize this, 2.3 was revised to, “Together, the prescriber and I decide my iMeds dose including after missed doses,” and 2.1 was revised to, “I ultimately decide the dose of my injectable medications”. |
| Client suggested we add an item about specific injection times offered at the site. | This is captured in level 5.2. Interviewer note was added to encourage participants to connect the levels to their main concerns while reviewing educational materials prior to starting the survey. |
|  | Client suggested we add an item about community care/support. | We were unable to add new items at this stage. Interviewer note was added to reiterate to clients that they share additional ideas in an open text box at the end of the survey. |
| **Formatting** | Participants gravitated towards clicking the thumbs up to select their preference rather than the option box. | Thumbs up were made clickable so that clients could select their choice by clicking the icon. |
| Several clients complained about the survey’s repetitiveness, which reduced their engagement. | Levels will be shuffled so that they appear more distinct from one another. Interviewers to advise clients from the outset that the survey may seem repetitive and clarify the reasoning. |
| Clients commented about the length of the survey, such as “Are we getting close yet?” | Merged choice of most and least wanted items into one question rather than two to shorten the survey. |
| Clients were often unsure how to engage with the ice cream example on slide four. | Language was revised to make it clearer that no choice needs to be made yet.  List of levels was revised to a row (vs. a column) to make it more distinct from the task. |
| Differing formatting of question 1 from all subsequent questions caused confusion | Question 1 formatting was changed to align with formatting of tasks 2-18. |
| After most/least wanted choices were merged to one question, some clients would forget to select both their most and least wanted options before advancing. | Program the submit button in the online version to be inactive until both a most and least wanted choice have been selected. |
| Some clients accidentally selected the wrong option or would want to change their answer. | Program the online survey to enable clients to go back and change their responses. |
| **Behaviour predicting questions** | *Least/Most Wanted Top Choices:*Confusion about how the options were generated for this question. Confusion around framing of these questions for former iOAT clients. Issues around framing of negative behavioural outcome for current iOAT clients; not only cessation of iOAT but reduction in daily engagement | Question stem revised to clarify, “These are the top most/least wanted items”.  Phrasing was revised for former iOAT clients to, “Are any of these keeping you from trying iOAT again?” and, “Would any of these need to be present for you to try iOAT again?” Phrasing was revised for current iOAT clients to “Would any of these items stop you from continuing with iOAT daily?” and, “Do any of these items have to be present for you to continue with iOAT daily?” |
| *Selected Individual Levels:*Specify the types of medications/formulations that would impact engagement in iOAT. | Question was reframed to prompt participants to select the type(s) of injectable medications and formulations that would stop them from trying iOAT again/continuing daily (if at all). A second question was added to prompt participants to select the type(s) of injectable medications and formulations that would need to be present for them to try iOAT again/continue daily |
